# Supplementary material
Source: Elsevier journal article supplement (https://pure.iiasa.ac.at/id/eprint/16421/2/mmc1.pdf)
Supplement: mmc1 [file mmc1.pdf]

**One Earth, Volume 2**

**Supplemental Information**

**Satellite Observations Reveal Inequalities  
in the Progress and Effectiveness of Recent  
Electrification in Sub-Saharan Africa**

**Giacomo Falchetta, Shonali Pachauri, Edward Byers, Olha Danylo, and Simon C. Parkinson**

## Supplemental Information

|                    |                            | TIER 0                                                     | TIER 1                     | TIER 2                                                                            | TIER 3                                                                          | TIER 4                                                                          | TIER 5                                              |
|--------------------|----------------------------|------------------------------------------------------------|----------------------------|-----------------------------------------------------------------------------------|---------------------------------------------------------------------------------|---------------------------------------------------------------------------------|-----------------------------------------------------|
| ATTRIBUTES         | 1. Peak Capacity           | Power capacity ratings <sup>28</sup><br>(in W or daily Wh) | Min 3 W                    | Min 50 W                                                                          | Min 200 W                                                                       | Min 800 W                                                                       | Min 2 kW                                            |
|                    |                            |                                                            | Min 12 Wh                  | Min 200 Wh                                                                        | Min 1.0 kWh                                                                     | Min 3.4 kWh                                                                     | Min 8.2 kWh                                         |
|                    |                            | OR Services                                                | Lighting of 1,000 lmhr/day | Electrical lighting, air circulation, television, and phone charging are possible |                                                                                 |                                                                                 |                                                     |
|                    | 2. Availability (Duration) | Hours per day                                              | Min 4 hrs                  | Min 4 hrs                                                                         | Min 8 hrs                                                                       | Min 16 hrs                                                                      | Min 23 hrs                                          |
|                    |                            | Hours per evening                                          | Min 1 hr                   | Min 2 hrs                                                                         | Min 3 hrs                                                                       | Min 4 hrs                                                                       | Min 4 hrs                                           |
|                    | 3. Reliability             |                                                            |                            |                                                                                   |                                                                                 | Max 14 disruptions per week                                                     | Max 3 disruptions per week of total duration <2 hrs |
|                    | 4. Quality                 |                                                            |                            |                                                                                   |                                                                                 | Voltage problems do not affect the use of desired appliances                    |                                                     |
|                    | 5. Affordability           |                                                            |                            |                                                                                   |                                                                                 | Cost of a standard consumption package of 365 kWh/year < 5% of household income |                                                     |
| 6. Legality        |                            |                                                            |                            |                                                                                   | Bill is paid to the utility, pre-paid card seller, or authorized representative |                                                                                 |                                                     |
| 7. Health & Safety |                            |                                                            |                            |                                                                                   | Absence of past accidents and perception of high risk in the future             |                                                                                 |                                                     |

**Figure S1:** Multi-tier matrix for measuring access to household electricity supply.  
Source: ref 1.

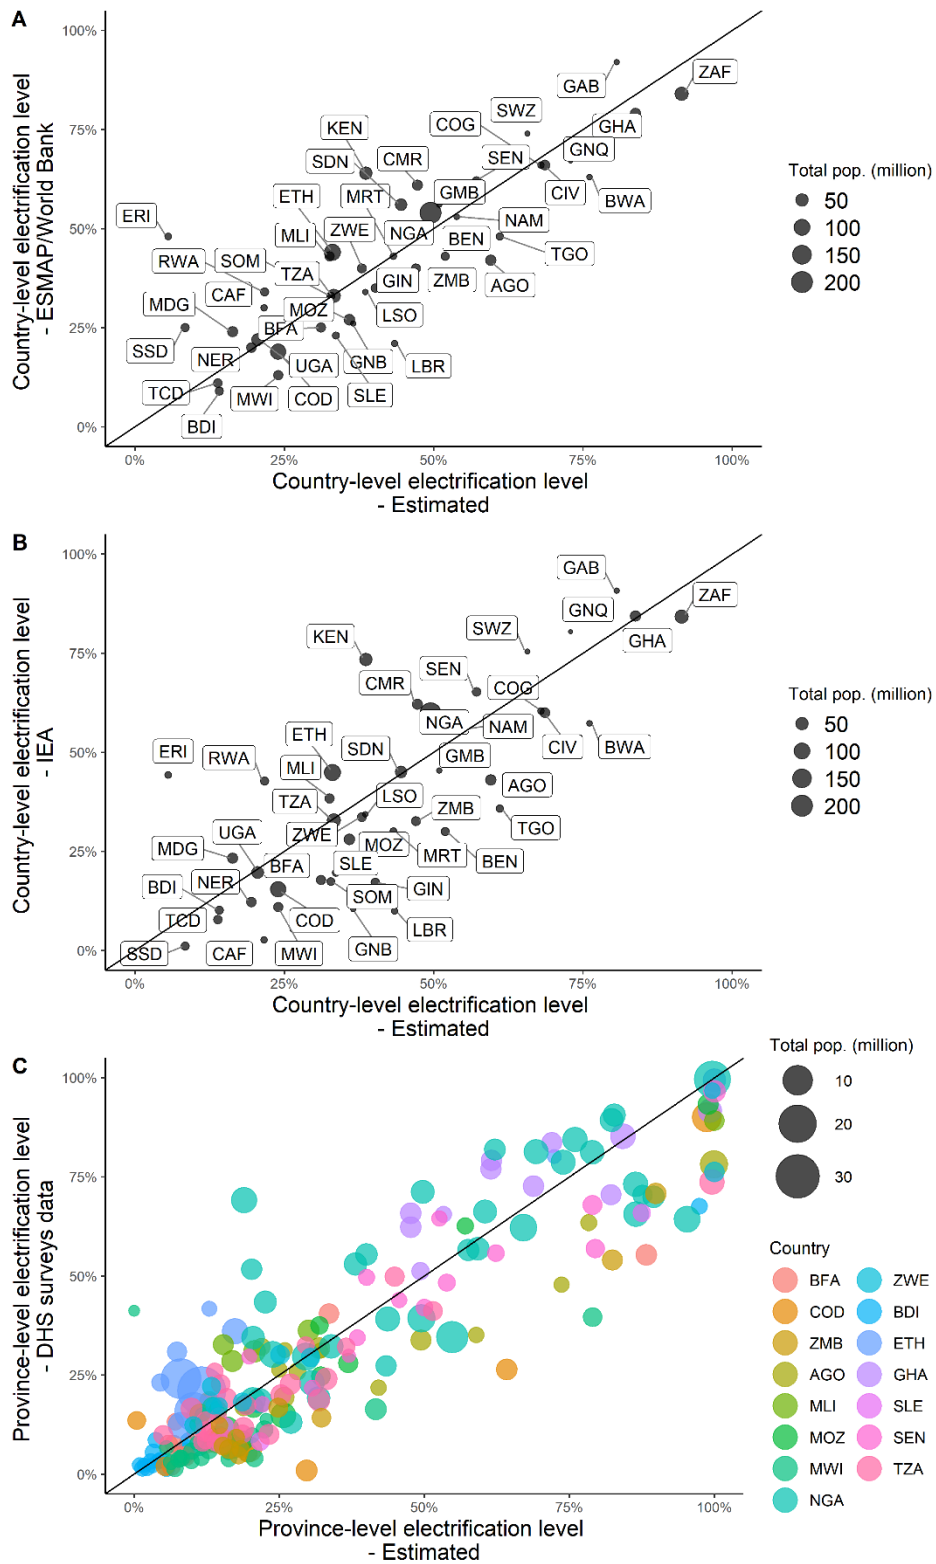

**Figure S2:** Validation plots for the electricity access estimates. Panel A: ESMAP/World Bank data; Panel B: IEA Access Database; Panel C: DHS province-level surveys.

Figure S3 shows a line plot – by country – of the electrification levels reported by the *Tracking SDG7: The Energy Progress Report 2019* (ref. 2). It reveals that a large number of countries seem to have kept quasi-linear changes in their reported electricity access level. Testing this hypothesis in a regression framework yields to a highly significance of the linear time trend (at a 1% level), but conversely it points to a rejection of the existence of a quadratic or cubic time trend at a 5% level of statistical significance.

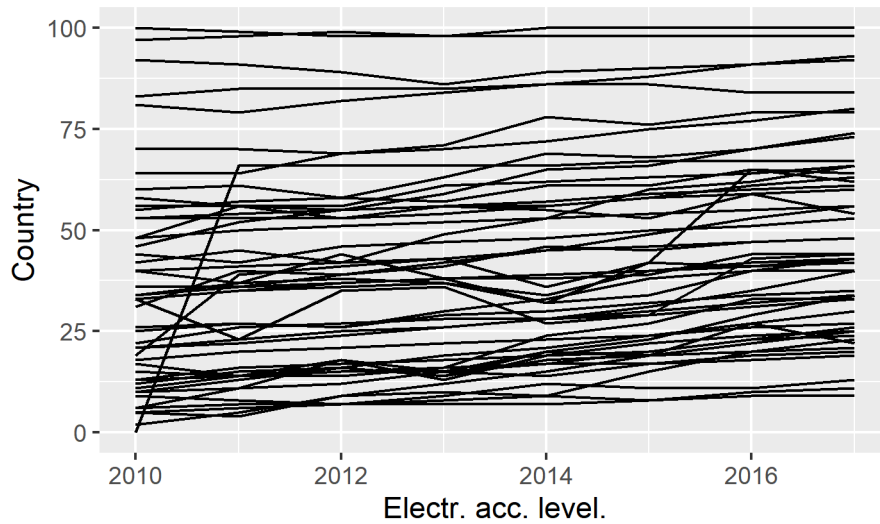

**Figure S3:** Electricity access level progress (2010-2017) according to the database of the *Tracking SDG7 report database* (ref. 2).

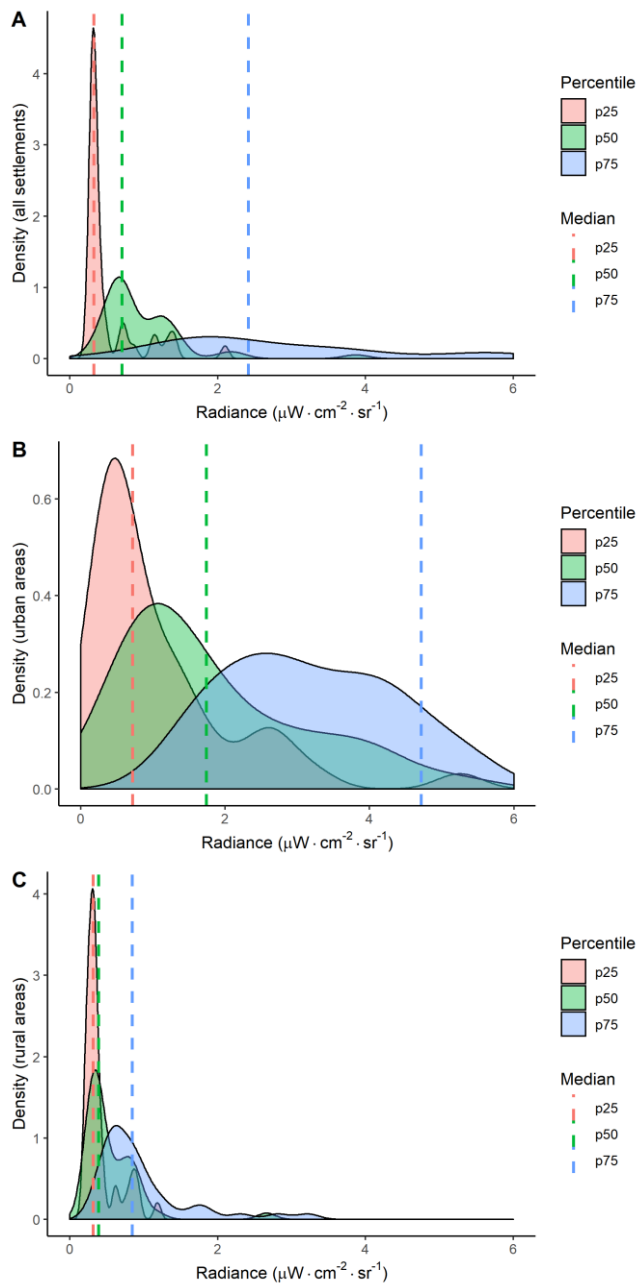

**Figure S4:** Distribution of nighttime light radiance and thresholds identified to define electricity access tiers for national, urban, and rural areas.

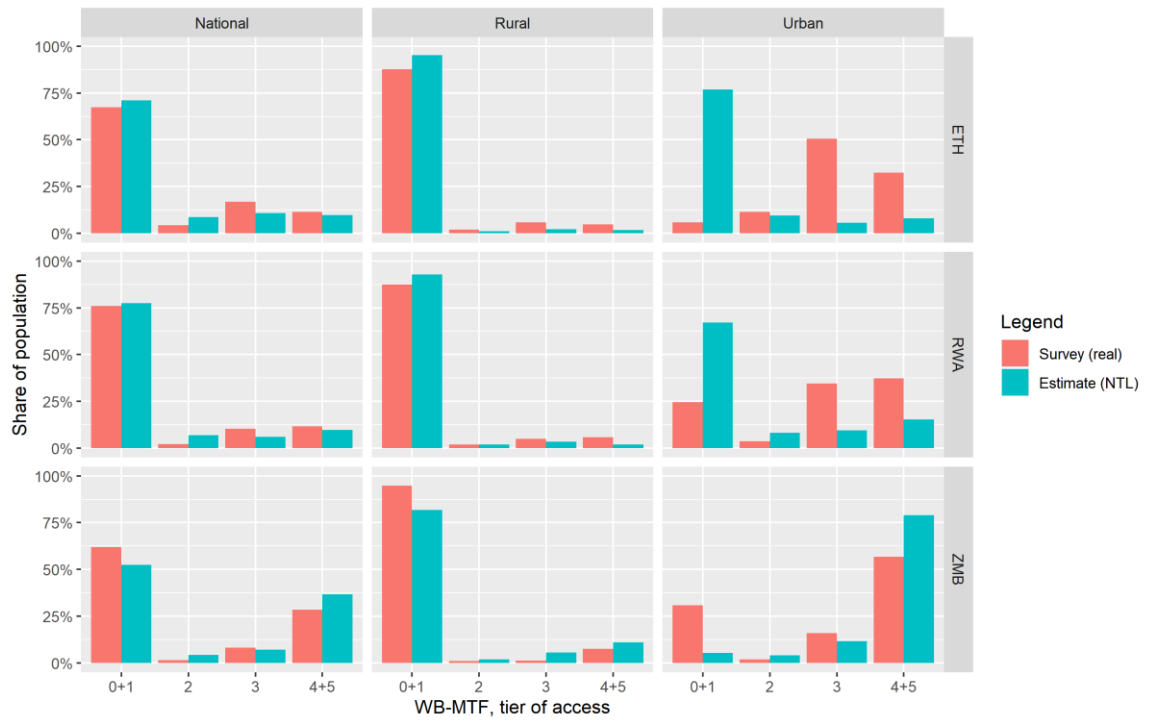

**Figure S5:** Share of the national, urban, and rural population with access to electricity in each access tier according to this paper estimates and the World Bank Multi-Tier Framework field data for Ethiopia, Rwanda, and Zambia.

**Table S1: DHS surveys data regression results**

|                                              | <i>Dependent variable:</i>       |                                  |                            |                          |                               |                                   |                          |
|----------------------------------------------|----------------------------------|----------------------------------|----------------------------|--------------------------|-------------------------------|-----------------------------------|--------------------------|
|                                              | Electr. access level 2019<br>(1) | Elect. progress 2014-2019<br>(2) | Average access tier<br>(3) | TV ownership<br>(4)      | Refrigerator ownership<br>(5) | Mobile telephone ownership<br>(6) | Radio ownership<br>(7)   |
| <b>Wealth distribution: Gini coefficient</b> | -1.463***<br>(0.142)             | 0.093***<br>(0.034)              | -4.790***<br>(0.483)       |                          |                               |                                   |                          |
| <b>Average access tier</b>                   |                                  |                                  |                            | 19.823***<br>(0.923)     | 13.181***<br>(0.681)          | 10.054***<br>(0.830)              | 6.812***<br>(0.745)      |
| <b>Constant</b>                              | 1.045***<br>(0.067)              | -0.020<br>(0.016)                | 2.588***<br>(0.226)        | 20.924***<br>(2.843)     | 11.405***<br>(2.098)          | 46.493***<br>(2.557)              | 38.608***<br>(2.293)     |
| <b>Observations</b>                          | 188                              | 188                              | 188                        | 216                      | 216                           | 216                               | 216                      |
| <b>R<sup>2</sup></b>                         | 0.579                            | 0.412                            | 0.464                      | 0.828                    | 0.780                         | 0.780                             | 0.670                    |
| <b>Adjusted R<sup>2</sup></b>                | 0.542                            | 0.361                            | 0.418                      | 0.814                    | 0.762                         | 0.762                             | 0.643                    |
| <b>Residual Std. Error</b>                   | 0.194 (df = 172)                 | 0.047 (df = 172)                 | 0.659 (df = 172)           | 10.257 (df = 199)        | 7.570 (df = 199)              | 9.225 (df = 199)                  | 8.274 (df = 199)         |
| <b>F Statistic</b>                           | 15.776*** (df = 15; 172)         | 8.040*** (df = 15; 172)          | 9.945*** (df = 15; 172)    | 59.987*** (df = 16; 199) | 44.016*** (df = 16; 199)      | 43.988*** (df = 16; 199)          | 25.236*** (df = 16; 199) |
| <b>Country fixed-effects</b>                 | Yes                              | Yes                              | Yes                        | Yes                      | Yes                           | Yes                               | Yes                      |

**Note:** \*p<0.1; \*\*p<0.05; \*\*\*p<0.01

**Table S2: ISO3– country names codebook**

| <b>ISO3</b> | <b>Country name</b>       |
|-------------|---------------------------|
| <b>AGO</b>  | Angola                    |
| <b>BDI</b>  | Burundi                   |
| <b>BEN</b>  | Benin                     |
| <b>BFA</b>  | Burkina Faso              |
| <b>BWA</b>  | Botswana                  |
| <b>CAF</b>  | Central African Republic  |
| <b>CIV</b>  | Côte d'Ivoire             |
| <b>CMR</b>  | Cameroon                  |
| <b>COD</b>  | Congo (Dem. Rep. of)      |
| <b>COG</b>  | Congo (Rep. of)           |
| <b>ERI</b>  | Eritrea                   |
| <b>ETH</b>  | Ethiopia                  |
| <b>GAB</b>  | Gabon                     |
| <b>GHA</b>  | Ghana                     |
| <b>GIN</b>  | Guinea                    |
| <b>GMB</b>  | Gambia                    |
| <b>GNB</b>  | Guinea-Bissau             |
| <b>GNQ</b>  | Equatorial Guinea         |
| <b>KEN</b>  | Kenya                     |
| <b>LBR</b>  | Liberia                   |
| <b>LSO</b>  | Lesotho                   |
| <b>MDG</b>  | Madagascar                |
| <b>MLI</b>  | Mali                      |
| <b>MOZ</b>  | Mozambique                |
| <b>MRT</b>  | Mauritania                |
| <b>MWI</b>  | Malawi                    |
| <b>NAM</b>  | Namibia                   |
| <b>NER</b>  | Niger                     |
| <b>NGA</b>  | Nigeria                   |
| <b>RWA</b>  | Rwanda                    |
| <b>SDN</b>  | Sudan                     |
| <b>SEN</b>  | Senegal                   |
| <b>SLE</b>  | Sierra Leone              |
| <b>SOM</b>  | Somalia                   |
| <b>SSD</b>  | South Sudan               |
| <b>SWZ</b>  | Swaziland                 |
| <b>TCD</b>  | Chad                      |
| <b>TGO</b>  | Togo                      |
| <b>TZA</b>  | Tanzania (United Rep. of) |
| <b>UGA</b>  | Uganda                    |
| <b>ZAF</b>  | South Africa              |
| <b>ZMB</b>  | Zambia                    |
| <b>ZWE</b>  | Zimbabwe                  |



**Table S3:** Datasets used in the modelling framework

| <b>Dataset</b>                                                                        | <b>Unit</b>                                             | <b>Source</b>      | <b>Time step</b> | <b>Spatial resolution</b> |
|---------------------------------------------------------------------------------------|---------------------------------------------------------|--------------------|------------------|---------------------------|
| High-resolution settlement layer                                                      | People                                                  | Ref. <sup>3</sup>  | 1 year           | 30 m                      |
| Global Human Settlement Layer – built up areas and settlement type layers             | Class                                                   | Ref. <sup>4</sup>  | 5 years          | 250 m                     |
| VIIRS-DNB nighttime light radiance                                                    | $\mu\text{W} \cdot \text{cm}^{-2} \cdot \text{sr}^{-1}$ | Ref. <sup>5</sup>  | 1 month          | 450 m                     |
| GADM shapefile                                                                        | -                                                       | Ref. <sup>6</sup>  | -                | -                         |
| DHS surveys                                                                           | % of people with access                                 | Ref. <sup>7</sup>  | Multiple years   | Province-level            |
| IEA Energy Access database                                                            | % of people with access                                 | Ref. <sup>8</sup>  | 1 year           | Country-level             |
| Tracking SDG7: The Energy Progress Report database                                    | % of people with access                                 | Ref. <sup>9</sup>  | 1 year           | Country-level             |
| Atlas of the Sustainable Development Goals from World Development Indicators database | % of people with access                                 | Ref. <sup>10</sup> | 1 year           | Country-level             |
| ESMAP Multi-tier Framework Surveys                                                    | kWh/household/year                                      | Ref. <sup>11</sup> | 1-2 years        | Household-level           |

## Supplemental References

1. Bhatia, M., and Angelou, N. (2015). Beyond connections: energy access redefined (World Bank).
2. IEA, and IRENA, W.H.O., United Nations Statistics Division, World Bank (2019). 2019 Tracking SDG7 Report.
3. Facebook Connectivity Lab, and Center for International Earth Science Information Network - CIESIN - Columbia University (2016). High Resolution Settlement Layer (HRSL).
4. Pesaresi, M., Huadong, G., Blaes, X., Ehrlich, D., Ferri, S., Gueguen, L., Halkia, M., Kauffmann, M., Kemper, T., Lu, L., et al. (2013). A global human settlement layer from optical HR/VHR RS data: concept and first results. *IEEE Journal of Selected Topics in Applied Earth Observations and Remote Sensing* 6, 2102–2131.
5. Elvidge, C.D., Baugh, K., Zhizhin, M., Hsu, F.C., and Ghosh, T. (2017). VIIRS night-time lights. *International Journal of Remote Sensing* 38, 5860–5879.
6. Hijmans, R., Garcia, N., and Wieczorek, J. (2018). GADM: database of global administrative areas. Version 3.6.
7. USAID (2009). MEASURE DHS STATcompiler.
8. IEA (2019). Africa Energy Outlook 2019.
9. IEA, IRENA, and United Nations Statistics Division (2019). Tracking SDG7: The Energy Progress Report 2019.
10. World Bank (2018). Atlas of Sustainable Development Goals 2018: From World Development Indicators (The World Bank).
11. World Bank (2019). Microdata Library.
